# Supplementary material
Source: PubMed Central journal article supplement (PMC2735604)
Supplement: NIHMS124182-supplement-song-jcc-sup_pdf.pdf [file NIHMS124182-supplement-song-jcc-sup_pdf.pdf]

## Supplementary Information

### MCCE2: Improving Protein pK<sub>a</sub> Calculations with Extensive Side Chain Rotamer Sampling

*Yifan Song, Junjun Mao and M. R. Gunner\**

Physics Department J-419

City College of New York

138th St. and Convent Ave.

New York, NY 10031

**Supplementary Material S1.** Rotamer making. The number of conformers is given for hen egg white lysozyme (4LZT). Default values for each step are given. Underlined values can be modified in running parameter input file.

| Step                             | Number of conformers          | Default rules                                                                                                                                                                    |
|----------------------------------|-------------------------------|----------------------------------------------------------------------------------------------------------------------------------------------------------------------------------|
|                                  | Lysozyme<br>(129 amino acids) |                                                                                                                                                                                  |
| 1. Prepare protein.              | 128 <sup>a</sup>              | Delete exposed water and ions; add NTR and CTR; add missing atoms to any group as needed.                                                                                        |
| 2. Build multiconformer protein  |                               |                                                                                                                                                                                  |
| a. Initial minimization          | 620                           | <u>5</u> initial minimization cycles based on ideal conformers closest to the native ones                                                                                        |
| b. Isosteric conformers          | 908                           | Asn, Gln, His                                                                                                                                                                    |
| c. Heavy atom rotamer            | 25707                         | Make heavy atom rotamers at <u>60°</u> intervals                                                                                                                                 |
| Self-energy pruning              | 3659                          | Delete rotamers with <u>&gt;10Kcal</u> total LJ and torsion energy to atoms in backbone and in the same conformer.                                                               |
| d. Packing and pruning           | 1201                          | Repack <u>5000</u> times. Keep conformers within <u>2.5 Kcal/mol</u> of the minimum energy conformers.                                                                           |
| e. Protons and ionization states | 2012                          | Heavy atom rotamers duplicated for each ionization state; polar protons added into each torsion minima.                                                                          |
| f. Heavy atom relaxation         | 4218                          | Energy minimization for neighboring pairs of all-atom conformers. <u>10</u> rounds with <u>100</u> <u>1</u> fs minimization steps.                                               |
| g. Hydroxyl optimization         | 6063                          | Hydroxyl hydrogens optimized to have favorable interactions with neighboring residue conformers.                                                                                 |
| h. Rotamer pruning               | 2301                          | Cluster conformers differing by less than <u>2Å</u> atomic distance; and <u>1.5 kcal/mol</u> LJ and <u>1.5 Kcal/mol</u> electrostatic pairwise interactions, retaining only one. |

<sup>a</sup>GLY has no side chain conformers, and NTR and CTR are counted as separate residues.

**Supplementary Material S2.** List of proteins analyzed, the PDB files used and source of the experimental pK<sub>a</sub>s

| Protein                                       | Exp pK <sub>a</sub><br>ref | PDB         | Method | # of<br>Models | Ligands<br>kept | Deleted ligands                            |
|-----------------------------------------------|----------------------------|-------------|--------|----------------|-----------------|--------------------------------------------|
| Ribonuclease $\alpha$ -sarcin precursor       | [1, 2]                     | 1DE3        | NMR    | 20             |                 |                                            |
| Apo E2                                        | [3]                        | <b>1LE2</b> | X-ray  | 1              |                 |                                            |
| Apo E3                                        | [4]                        | <b>1NFN</b> | X-ray  | 1              |                 |                                            |
| Apo E4                                        | [3]                        | <b>1GS9</b> | X-ray  | 1              |                 |                                            |
| B1 Domain of protein G                        | [5]                        | 1GB1        | NMR    | 60             |                 |                                            |
|                                               |                            | 1PGA        | X-ray  | 1              |                 |                                            |
|                                               |                            | <b>1PGB</b> | X-ray  | 1              |                 |                                            |
| B2 Domain of protein G                        | [5]                        | 2IGH        | NMR    | 24             |                 |                                            |
|                                               |                            | <b>1IGD</b> | X-ray  | 1              |                 |                                            |
|                                               |                            | 2IGD        | X-ray  | 1              |                 |                                            |
| Barnase                                       | [6-10]                     | <b>1A2P</b> | X-ray  | 3              |                 | Surface Zn                                 |
|                                               |                            | 1B2X        | X-ray  | 3              |                 | Surface Zn                                 |
|                                               |                            | 1BNR        | NMR    | 20             |                 |                                            |
|                                               |                            | 1FW7        | NMR    | 20             |                 |                                            |
| Pancreatic trypsin inhibitor precursor (BPTI) | [11, 12]                   | 1BPI        | X-ray  | 1              |                 | Surface PO4                                |
|                                               |                            | 1JV8        | NMR    | 23             |                 |                                            |
|                                               |                            | <b>4PTI</b> | X-ray  | 1              |                 |                                            |
| Calbindin D9k                                 | [13]                       | 1KQV        | NMR    | 30             |                 | LA(III) not affecting benchmarked residues |
|                                               |                            | 1KSM        | NMR    | 1              |                 | LA(III)                                    |
|                                               |                            | <b>1IG5</b> | X-ray  | 1              |                 | Mg                                         |
|                                               |                            | 4ICB        | X-ray  | 1              |                 | Ca                                         |
| Cardiotoxin A5                                | [14]                       | <b>1KXI</b> | X-ray  | 2              |                 |                                            |
| CD2d1                                         | [15]                       | <b>1HNG</b> | X-ray  | 2              |                 |                                            |
| Chymotrypsin                                  | [16]                       | <b>2TGA</b> | X-ray  |                |                 | Ca                                         |
| Chymotrypsin Inhibitor 2                      | [17]                       | <b>2CI2</b> | X-ray  | 1              |                 |                                            |
|                                               |                            | 2SNI        | X-ray  | 1              |                 | Ca, only chain I is used                   |
|                                               |                            | 3CI2        | NMR    | 20             |                 |                                            |
| Cyclophilin                                   | [18]                       | <b>2CPL</b> | X-ray  |                |                 |                                            |
|                                               |                            | 1OCA        | NMR    | 20             |                 |                                            |
| Epidermal growth factor                       | [19]                       | 1EGF        | NMR    | 16             |                 |                                            |
|                                               |                            | 1EPG        | NMR    | 1              |                 |                                            |
|                                               |                            | 1EPH        | NMR    | 10             |                 |                                            |
|                                               |                            | 1EPI        | NMR    | 1              |                 |                                            |
|                                               |                            | 1EPJ        | NMR    | 5              |                 |                                            |
| FKBP                                          | [18]                       | 1FKS        | NMR    |                |                 |                                            |
| fungal beta cryptogein                        | [20]                       | 1BEG        | NMR    | 18             |                 |                                            |
|                                               |                            | <b>1BEO</b> | X-ray  | 1              |                 |                                            |
|                                               |                            | 1BXM        | X-ray  | 1              |                 | ERG                                        |

|                                          |          |             |       |    |     |            |
|------------------------------------------|----------|-------------|-------|----|-----|------------|
| hen egg white lysozyme                   | [21-23]  | 1E8L        | NMR   | 50 |     |            |
|                                          |          | 1LSE        | X-ray | 1  |     |            |
|                                          |          | <b>4LZT</b> | X-ray | 1  |     | NO3        |
| human DNA polymerase lambda lyase domain | [24]     | 1NZP        | NMR   | 8  |     |            |
|                                          |          | <b>1XSN</b> | X-ray | 1  |     |            |
| MutT                                     | [25]     | 1PPX        | NMR   | 20 |     | 8OG, MO2   |
|                                          |          | 1MUT        | NMR   | 15 |     |            |
| Myoglobin - horse                        | [26, 27] | <b>1DWR</b> | X-ray | 1  | HEM | CMO,S04    |
|                                          |          | 1WLA        | X-ray | 1  | HEM | S04        |
|                                          |          | 1YMB        | X-ray |    | HEM | S04        |
| Myoglobin - sperm whale                  | [26, 28] | 1MYF        | NMR   | 12 | HEM |            |
|                                          |          | <b>1A6K</b> | X-ray | 1  | HEM | S04        |
|                                          |          | 1A6M        | X-ray | 1  | HEM | Oxy,S04    |
| phage T4 lysozyme                        | [29]     | <b>2LZM</b> | X-ray | 1  |     |            |
| phage T4 lysozyme M102K mutant           | [30]     | 1L54        | X-ray | 1  |     |            |
| Phosphonoacetaldehyde hydrolase          | [31]     | 1FEZ        | X-ray | 4  |     | Mg, WO4    |
|                                          |          | <b>1RQL</b> | X-ray | 2  |     | Mg, VSO    |
| RNase A                                  | [32, 33] | 2AAS        | NMR   | 32 |     |            |
|                                          |          | 7RSA        | X-ray | 1  |     | TBU        |
|                                          |          | 9RAT        | X-ray | 1  |     |            |
|                                          |          | <b>3RN3</b> | X-ray | 1  |     | S04        |
| RNase H1                                 | [34, 35] | 1RCH        | NMR   | 8  |     |            |
|                                          |          | <b>1GOA</b> | X-ray | 1  |     |            |
|                                          |          | 2RN2        | X-ray | 1  |     |            |
| RNase SA                                 | [36]     | 1C54        | NMR   | 20 |     |            |
|                                          |          | 1LNI        | X-ray | 2  |     | GOL,S04    |
|                                          |          | <b>1RGG</b> | X-ray | 2  |     | S04        |
| RNase T1                                 | [37-40]  | 1IYY        | NMR   | 24 |     |            |
|                                          |          | <b>1IOV</b> | X-ray | 1  |     | ADP,MG,POB |
|                                          |          | 1BVI        | X-ray | 4  |     | 2GP,Ca     |
|                                          |          | 1RGA        | X-ray | 1  |     | 3GP, Ca, G |
| Sea anemone neurotoxin III               | [41]     | 1ANS        | NMR   | 28 |     |            |
| snake erabutoxin b                       | [42]     | 1ERA        | NMR   | 1  |     |            |
|                                          |          | 1FRA        | NMR   | 14 |     |            |
|                                          |          | <b>3EBX</b> | X-ray | 1  |     | S04        |
| <i>Staphylococcal</i> Nuclease           | [43]     | <b>1STY</b> | X-ray |    |     |            |
| <i>Streptomyces</i> Subtilisin Inhibitor | [44]     | <b>2SIC</b> | X-ray | 1  |     | Ca         |
|                                          |          | 3SIC        | X-ray | 1  |     | Ca         |
|                                          |          | 5SIC        | X-ray | 1  |     | Ca         |
|                                          |          | 3SSI        | X-ray | 1  |     |            |

|                            |          |             |              |             |                                                                                  |
|----------------------------|----------|-------------|--------------|-------------|----------------------------------------------------------------------------------|
| Sso7d                      | [45]     | 1JIC        | NMR          | 1           |                                                                                  |
|                            |          | 1SSO        | NMR          | 1           |                                                                                  |
|                            |          | 1BBX        | NMR          | 2           |                                                                                  |
|                            |          | <i>1C8C</i> | <i>X-ray</i> | <i>1</i>    | <i>Not used in this study due to the methylated residue 1 and disordered CTR</i> |
| Thioredoxin (reduced)      | [46]     | <b>1ERT</b> | X-ray        | 1           |                                                                                  |
|                            |          | 3TRX        | NMR          | 1           |                                                                                  |
|                            |          | 4TRX        | NMR          | 33          |                                                                                  |
| Thioredoxin (oxidized)     | [46]     | <b>1ERU</b> | X-ray        | 1           |                                                                                  |
|                            |          | 1AUC        | X-ray        | 1           |                                                                                  |
| Turkey ovomucoid inhibitor | [47, 48] | 1OMT        | NMR          | 50          |                                                                                  |
|                            |          | 1OMU        | NMR          | 50          |                                                                                  |
|                            |          | <b>1PPF</b> | X-ray        | 1           | BMA,FUC,GAL,GLC,MAN,NAG -- complex structure                                     |
|                            |          | 1TUR        | NMR          | 12          |                                                                                  |
|                            |          | 1TUS        | NMR          | 12          |                                                                                  |
| Tyrosin phosphatase        | [49, 50] | 1BVH        | NMR          | 15          |                                                                                  |
|                            |          | <b>1DG9</b> | X-ray        | 1           | EPE                                                                              |
|                            |          | 1Z12        | X-ray        | 1           | VO4                                                                              |
|                            |          | 1Z13        | X-ray        | 1           | MOO                                                                              |
|                            |          | 1PNT        | X-ray        | 1           | PO4                                                                              |
|                            |          | Xylanase BA | [51]         | <b>1H4G</b> | X-ray                                                                            |
|                            |          | 1H4H        | X-ray        | 4           | XYP,XYS, residue 1 changed from Glu to Gln                                       |
|                            |          | 1QH6        | X-ray        | 2           | FXP                                                                              |
|                            |          | 1QH7        | X-ray        | 2           | XYP                                                                              |
| Xylanase BC                | [52]     | 1BVV        | X-ray        | 1           | DFX,XYP                                                                          |
|                            |          | 1C5H        | X-ray        | 1           |                                                                                  |
|                            |          | <b>1XNB</b> | X-ray        | 1           | SO4                                                                              |

Bold: PDB files used for the dataset with 1 X-ray structure/protein.

#### References:

1. Perez-Canadillas, J.M., et al., *Biochemistry*, 1998. **37**(45): p. 15865-76.
2. Garcia-Mayoral, M.F., et al., *Biochemistry*, 2003. **42**(45): p. 13122-33.
3. Lund-Katz, S., et al., *J Lipid Res*, 2001. **42**(6): p. 894-901.
4. Lund-Katz, S., et al., *J Biol Chem*, 2000. **275**(44): p. 34459-64.
5. Khare, D., et al., *Biochemistry*, 1997. **36**(12): p. 3580-9.
6. Oliveberg, M., V.L. Arcus, and A.R. Fersht, *Biochemistry*, 1995. **34**(29): p. 9424-33.
7. Loewenthal, R., J. Sancho, and A.R. Fersht, *J Mol Biol*, 1992. **224**(3): p. 759-70.
8. Loewenthal, R., et al., *J. Mol. Biol.*, 1993. **232**: p. 574-583.
9. Mossakowska, D.E., K. Nyberg, and A.R. Fersht, *Biochemistry*, 1989. **28**(9): p. 3843-50.
10. Sali, D., M. Bycroft, and A.R. Fersht, *Nature*, 1988. **335**(6192): p. 740-3.
11. March, K.L., et al., *Biochemistry*, 1982. **21**(21): p. 5241-5251.

12. Richarz, R. and K. Wuthrich, *Biochemistry*, 1978. **17**: p. 2263-2269.
13. Kesvatera, T., et al., *J Mol Biol*, 1996. **259**(4): p. 828-39.
14. Chiang, C.M., et al., *Biochemistry*, 1996. **35**: p. 9177-9186.
15. Chen, H.A., et al., *Biochemistry*, 2000. **39**(23): p. 6814-24.
16. Markley, J.L. and I.B. Ibanez, *Biochemistry*, 1978. **17**(22): p. 4627-40.
17. Tan, Y., et al., *J. Mol. Biol.*, 1995. **254**: p. 980-92.
18. Yu, L. and S.W. Fesik, *Biochim Biophys Acta*, 1994. **1209**(1): p. 24-32.
19. Kohda, D., T. Sawada, and F. Inagaki, *Biochemistry*, 1991. **30**: p. 4896-4900.
20. Gooley, P.R., et al., *J Biomol NMR*, 1998. **12**(4): p. 523-34.
21. Bartik, K., C. Redfield, and C.M. Dobson, *Biophys J*, 1994. **66**(4): p. 1180-4.
22. Kuramitsu, S. and K. Hamaguchi, *J Biochem (Tokyo)*, 1980. **87**(4): p. 1215-9.
23. Takahashi, T., H. Nakamura, and A. Wada, *Biopolymers*, 1992. **32**: p. 897-909.
24. Gao, G., et al., *Biochemistry*, 2006. **45**(6): p. 1785-94.
25. Harris, T.K., et al., *Biochemistry*, 2000. **39**(7): p. 1655-74.
26. Kao, Y.H., et al., *Biophys J*, 2000. **79**(3): p. 1637-54.
27. Papa, S., et al., *Ann N Y Acad Sci*, 1992. **671**: p. 345-358.
28. Bashford, D., et al., *Biochemistry*, 1993: p. 8045-8056.
29. Anderson, D.E., W.J. Becktel, and F.W. Dahlquist, *Biochemistry*, 1990. **29**(9): p. 2403-8.
30. Dao-pin, S., et al., *Biochemistry*, 1991. **30**(49): p. 11521-9.
31. Zhang, G., et al., *Biochemistry*, 2002. **41**(45): p. 13370-7.
32. Rico, M., et al. *Proceedings of the 2nd International Meeting*. 1991. Sant Feliu de Guixols, Girona, Spain.
33. Baker, W.R. and A. Kintanar, *Arch Biochem Biophys*, 1996. **327**(1): p. 189-99.
34. Oda, Y., M. Yoshida, and S. Kanaya, *J Biol Chem*, 1993. **268**(1): p. 88-92.
35. Oda, Y., et al., *Biochemistry*, 1994. **33**(17): p. 5275-84.
36. Laurents, D.V., et al., *J Mol Biol*, 2003. **325**(5): p. 1077-92.
37. Koumanov, A., et al., *Eur Biophys J*, 2001. **30**(3): p. 198-206.
38. Spitzner, N., et al., *Eur Biophys J*, 2001. **30**(3): p. 186-97.
39. Inagaki, F., et al., *J Biochem (Tokyo)*, 1981. **89**(4): p. 1185-95.
40. Giletto, A. and C.N. Pace, *Biochemistry*, 1999. **38**(40): p. 13379-84.
41. Norton, R.S., et al., *Biochem J*, 1993. **293 ( Pt 2)**: p. 545-51.
42. Inagaki, F., et al., *Eur J Biochem*, 1978. **89**(2): p. 433-42.
43. Lee, K.K., C.A. Fitch, and E.B. Garcia-Moreno, *Protein Sci*, 2002. **11**(5): p. 1004-16.
44. Fujii, S., K. Akasaka, and H. Hatano, *J Biochem (Tokyo)*, 1980. **88**(3): p. 789-96.
45. Consonni, R., et al., *Biochemistry*, 2003. **42**(6): p. 1421-9.
46. Forman-Kay, J.D., G.M. Clore, and A.M. Gronenborn, *Biochemistry*, 1992. **31**(13): p. 3442-52.
47. Schaller, W. and A.D. Robertson, *Biochemistry*, 1995. **34**(14): p. 4714-4723.
48. Swint-Kruse, L. and A.D. Robertson, *Biochemistry*, 1995. **34**(14): p. 4724-4732.
49. Zhou, M.M., J.P. Davis, and R.L. Van Etten, *Biochemistry*, 1993. **32**(33): p. 8479-86.
50. Tishmack, P.A., et al., *Biochemistry*, 1997. **36**(39): p. 11984-94.
51. Betz, M., et al., *Biochemistry*, 2004. **43**(19): p. 5820-31.
52. Joshi, M.D., A. Hedberg, and L.P. McIntosh, *Protein Sci*, 1997. **6**(12): p. 2667-70.

**Supplementary Material S3. Calculated pK<sub>a</sub>s - FULL MCCE single X-ray structure; 33 proteins**

| <b>Protein</b>         | <b>Res</b> | <b>Calc pK1</b> | <b>Calc pK2</b> | <b>exp pK</b> | <b>Comments</b>      | <b>DSSP</b> |
|------------------------|------------|-----------------|-----------------|---------------|----------------------|-------------|
| Apo E2                 | LYS 69     | 12.6            |                 | 10.1          |                      | H           |
| Apo E2                 | LYS 72     | 10.6            |                 | 10            |                      | H           |
| Apo E2                 | LYS 75     | 11.3            |                 | 10            |                      | H           |
| Apo E2                 | LYS 95     | 10.1            |                 | 10.2          |                      | H           |
| Apo E2                 | LYS 143    | 10.1            |                 | 9.4           |                      | H           |
| Apo E2                 | LYS 146    | 9.2             |                 | 9.9           |                      | H           |
| Apo E2                 | LYS 157    | 11.5            |                 | 10.9          |                      | H           |
| Apo E3                 | LYS 69     | 11.7            |                 | 10.4          |                      | H           |
| Apo E3                 | LYS 72     | 10.7            |                 | 10            |                      | H           |
| Apo E3                 | LYS 75     | 11.8            |                 | 10.1          |                      | H           |
| Apo E3                 | LYS 95     | 10.2            |                 | 10.1          |                      | H           |
| Apo E3                 | LYS 143    | 9.7             |                 | 9.5           |                      | H           |
| Apo E3                 | LYS 146    | 9.7             |                 | 9.2           |                      | H           |
| Apo E3                 | LYS 157    | 12.0            |                 | 11.1          |                      | H           |
| Apo E4                 | LYS 69     | 11.2            |                 | 10.1          |                      | H           |
| Apo E4                 | LYS 72     | 10.4            |                 | 10            |                      | H           |
| Apo E4                 | LYS 75     | 10.5            |                 | 10.1          |                      | H           |
| Apo E4                 | LYS 95     | 10.7            |                 | 10.1          |                      | H           |
| Apo E4                 | LYS 143    | 9.8             |                 | 9.9           |                      | H           |
| Apo E4                 | LYS 146    | 9.8             |                 | 9.4           |                      | H           |
| Apo E4                 | LYS 157    | 11.9            |                 | 10.9          |                      | H           |
| B1 Domain of protein G | TYR 3      | 15.6            |                 | 11            | Lower Limit          | E           |
| B1 Domain of protein G | LYS 4      | 11.8            |                 | 11            | Lower Limit          | E           |
| B1 Domain of protein G | LYS 10     | 11.9            |                 | 11            | expt val approximate | S           |
| B1 Domain of protein G | LYS 13     | 11.8            |                 | 11            | Lower Limit          | E           |
| B1 Domain of protein G | GLU 15     | 5.0             |                 | 4.4           |                      | E           |
| B1 Domain of protein G | GLU 19     | 4.1             |                 | 3.7           |                      | E           |
| B1 Domain of protein G | ASP 22     | 2.3             |                 | 2.9           |                      | S           |
| B1 Domain of protein G | GLU 27     | 4.9             |                 | 4.5           |                      | H           |
| B1 Domain of protein G | LYS 28     | 10.9            |                 | 10.9          |                      | H           |
| B1 Domain of protein G | TYR 33     | 11.1            |                 | 11            | expt val approximate | H           |
| B1 Domain of protein G | ASP 36     | 4.9             |                 | 3.8           |                      | H           |
| B1 Domain of protein G | ASP 40     | 4.4             |                 | 4             |                      | L           |
| B1 Domain of protein G | GLU 42     | 4.0             |                 | 4.4           |                      | E           |
| B1 Domain of protein G | TYR 45     | 15.8            |                 | 12            | Lower Limit          | E           |
| B1 Domain of protein G | ASP 46     | 3.8             |                 | 3.6           |                      | E           |
| B1 Domain of protein G | ASP 47     | 3.3             |                 | 3.4           |                      | T           |
| B1 Domain of protein G | GLU 56     | 3.7             |                 | 4             |                      | L           |
| B2 Domain of protein G | TYR 8      | 14.8            |                 | 11            | Lower Limit          | E           |
| B2 Domain of protein G | LYS 9      | 11.5            |                 | 11            | expt val approximate | E           |
| B2 Domain of protein G | LYS 15     | 12.4            |                 | 11            | Lower Limit          | S           |
| B2 Domain of protein G | LYS 18     | 11.6            |                 | 11            | Lower Limit          | E           |
| B2 Domain of protein G | GLU 20     | 4.8             |                 | 4.3           |                      | E           |
| B2 Domain of protein G | LYS 24     | 11.1            |                 | 10.7          |                      | E           |
| B2 Domain of protein G | ASP 27     | 3.0             |                 | 2.9           |                      | S           |

|                                                        |               |            |     |             |                                          |          |
|--------------------------------------------------------|---------------|------------|-----|-------------|------------------------------------------|----------|
| B2 Domain of protein G                                 | GLU 29        | 4.3        |     | 4.2         |                                          | H        |
| B2 Domain of protein G                                 | GLU 32        | 4.9        |     | 4.6         |                                          | H        |
| B2 Domain of protein G                                 | LYS 33        | 10.8       |     | 11          | expt val approximate                     | H        |
| B2 Domain of protein G                                 | TYR 38        | 11.9       |     | 11          | expt val approximate                     | H        |
| B2 Domain of protein G                                 | ASP 41        | 5.1        |     | 3.9         |                                          | H        |
| B2 Domain of protein G                                 | ASP 45        | 4.4        |     | 4           |                                          | L        |
| B2 Domain of protein G                                 | TYR 50        | 16.3       |     | 12          | Lower Limit                              | E        |
| B2 Domain of protein G                                 | ASP 51        | 3.6        |     | 3.6         |                                          | E        |
| B2 Domain of protein G                                 | ASP 52        | 3.2        |     | 3.4         |                                          | T        |
| B2 Domain of protein G                                 | GLU 61        | 4.7        |     | 4.2         |                                          | L        |
| <i>Bacterial phosphono-<br/>acetaldehyde hydrolase</i> | <i>LYS 53</i> | <i>7.8</i> |     | <i>9.3</i>  | <i>pH dependence of<br/>inactivation</i> | <i>H</i> |
| <i>Bacterial proteinase<br/>inhibitor Ssi</i>          | <i>HIS 43</i> | <i>1.7</i> |     | <i>3.15</i> | <i>A - see below</i>                     | <i>L</i> |
| Bacterial proteinase<br>inhibitor Ssi                  | HIS 106       | 4.9        |     | 6           |                                          | T        |
| Barnase                                                | ASP 8         | 3.6        |     | 3.3         |                                          | H        |
| Barnase                                                | ASP 12        | 4.0        |     | 3.8         |                                          | H        |
| Barnase                                                | HIS 18        | 7.6        |     | 7.73        |                                          | S        |
| Barnase                                                | ASP 22        | 3.9        |     | 3.3         |                                          | T        |
| Barnase                                                | GLU 29        | 5.3        |     | 3.75        |                                          | H        |
| Barnase                                                | ASP 44        | 4.2        |     | 3.35        |                                          | H        |
| Barnase                                                | ASP 54        | 3.8        |     | 2.2         |                                          | E        |
| Barnase                                                | GLU 60        | 3.9        |     | 3           |                                          | T        |
| Barnase                                                | GLU 73        | 2.1        | 4.4 | 2.2         |                                          | E        |
| Barnase                                                | ASP 75        | 2.4        |     | 3.1         | change boundary                          | E        |
| Barnase                                                | ASP 86        | 5.8        |     | 4.2         |                                          | L        |
| Barnase                                                | ASP 93        | 1.2        |     | 2           | Upper Limit                              | T        |
| Barnase                                                | ASP 101       | 2.0        | 1.1 | 2           |                                          | S        |
| Barnase                                                | HIS 102       | 6.2        |     | 6.3         |                                          | T        |
| Barnase                                                | CTR           | 3.6        |     | 3.3         |                                          | ND       |
| BPTI                                                   | NTR           | 6.9        |     | 7.9         |                                          | ND       |
| BPTI                                                   | ASP 3         | 3.5        |     | 3.55        |                                          | G        |
| BPTI                                                   | GLU 7         | 3.9        |     | 3.85        |                                          | S        |
| BPTI                                                   | TYR 10        | 10.2       |     | 9.46        |                                          | L        |
| BPTI                                                   | LYS 15        | 10.7       |     | 10.4        |                                          | L        |
| BPTI                                                   | TYR 21        | 10.5       |     | 9.94        |                                          | E        |
| BPTI                                                   | TYR 23        | 12.2       |     | 11          |                                          | E        |
| BPTI                                                   | LYS 26        | 10.7       |     | 10.4        |                                          | T        |
| BPTI                                                   | TYR 35        | 10.4       |     | 10.6        |                                          | E        |
| BPTI                                                   | LYS 41        | 11.3       |     | 10.8        |                                          | L        |
| BPTI                                                   | LYS 46        | 10.5       |     | 10.4        |                                          | S        |
| BPTI                                                   | GLU 49        | 4.0        |     | 3.91        |                                          | H        |
| BPTI                                                   | ASP 50        | 2.7        |     | 3.2         |                                          | H        |
| BPTI                                                   | CTR           | 3.7        |     | 3.1         |                                          | ND       |
| Calbindin D9k                                          | LYS 1         | 11.3       |     | 10.6        |                                          | L        |
| Calbindin D9k                                          | GLU 4         | 4.1        |     | 3.8         |                                          | H        |
| Calbindin D9k                                          | GLU 5         | 2.8        |     | 3.4         |                                          | H        |
| Calbindin D9k                                          | LYS 7         | 11.6       |     | 11.4        |                                          | H        |



|                          |         |      |      |             |    |
|--------------------------|---------|------|------|-------------|----|
| Calbindin D9k            | GLU 11  | 4.9  | 4.7  |             | H  |
| Calbindin D9k            | LYS 12  | 11.2 | 11.1 |             | H  |
| Calbindin D9k            | LYS 16  | 11.9 | 10.1 |             | T  |
| Calbindin D9k            | GLU 17  | 3.5  | 3.62 |             | S  |
| Calbindin D9k            | LYS 25  | 11.7 | 11.7 |             | H  |
| Calbindin D9k            | GLU 26  | 3.7  | 4.1  |             | H  |
| Calbindin D9k            | LYS 29  | 11.0 | 11.4 |             | H  |
| Calbindin D9k            | LYS 41  | 10.7 | 10.9 |             | L  |
| Calbindin D9k            | ASP 47  | 3.9  | 3    |             | H  |
| Calbindin D9k            | GLU 48  | 4.4  | 4.6  |             | H  |
| Calbindin D9k            | LYS 55  | 12.2 | 12.1 |             | T  |
| Calbindin D9k            | GLU 64  | 3.7  | 3.8  |             | H  |
| Calbindin D9k            | LYS 71  | 9.8  | 10.7 |             | H  |
| Calbindin D9k            | LYS 72  | 10.6 | 11.3 |             | H  |
| Calbindin D9k            | CTR     | 3.9  | 3.2  |             | ND |
| Cardiotoxin A5           | HIS 4   | 6.2  | 5.6  |             | E  |
| Cardiotoxin A5           | GLU 17  | 3.8  | 4    |             | T  |
| Cardiotoxin A5           | ASP 42  | 3.2  | 3.2  |             | S  |
| Cardiotoxin A5           | ASP 59  | 1.8  | 2.3  | Upper Limit | T  |
| CD2d1                    | ASP 2   | 2.3  | 3.5  |             | L  |
| CD2d1                    | ASP 25  | 3.5  | 3.53 |             | T  |
| CD2d1                    | ASP 26  | 4.0  | 3.58 |             | T  |
| CD2d1                    | ASP 28  | 4.0  | 3.57 |             | E  |
| CD2d1                    | GLU 29  | 5.1  | 4.51 |             | E  |
| CD2d1                    | GLU 33  | 4.0  | 4.2  |             | E  |
| CD2d1                    | GLU 41  | 6.7  | 6.53 |             | E  |
| CD2d1                    | GLU 56  | 4.4  | 3.95 |             | E  |
| CD2d1                    | ASP 62  | 6.2  | 4.18 |             | L  |
| CD2d1                    | ASP 71  | 3.8  | 3.2  |             | G  |
| CD2d1                    | ASP 72  | 5.2  | 4.14 |             | G  |
| CD2d1                    | ASP 94  | 3.1  | 3.83 |             | E  |
| CD2d1                    | GLU 99  | 4.3  | 4.1  |             | L  |
| CD2d1                    | CTR     | 4.0  | 3.11 |             | ND |
| Chymotrypsin Inhibitor 2 | GLU 23  | 4.3  | 3.2  |             | B  |
| Chymotrypsin Inhibitor 2 | GLU 26  | 2.4  | 3.3  |             | G  |
| Chymotrypsin Inhibitor 2 | GLU 33  | 3.2  | 4.2  |             | H  |
| Chymotrypsin Inhibitor 2 | GLU 34  | 3.8  | 3.8  |             | H  |
| Chymotrypsin Inhibitor 2 | GLU 45  | 3.2  | 3.85 |             | T  |
| Chymotrypsin Inhibitor 2 | GLU 60  | 3.1  | 3.5  |             | L  |
| Chymotrypsin Inhibitor 2 | ASP 64  | 4.8  | 3.8  |             | T  |
| Chymotrypsin Inhibitor 2 | ASP 71  | 2.1  | 2.8  |             | L  |
| Chymotrypsin Inhibitor 2 | ASP 74  | 4.4  | 4.95 |             | S  |
| chymotrypsinogen         | His 40  | 3.7  | 4.6  |             | E  |
| chymotrypsinogen         | His 57  | 8.8  | 7.3  |             | G  |
| Cyclophilin              | HIS 54  | 1.4  | 4.2  | Upper Limit | L  |
| Cyclophilin              | HIS 70  | 6.3  | 5.8  |             | S  |
| Cyclophilin              | HIS 92  | -2.8 | 4.2  | Upper Limit | L  |
| Cyclophilin              | HIS 126 | 5.2  | 6.3  |             | S  |
| Fungal beta cryptogein   | NTR     | 9.0  | 7.43 |             | ND |

|                                             |                                                         |      |      |                      |    |
|---------------------------------------------|---------------------------------------------------------|------|------|----------------------|----|
| Fungal beta cryptogein                      | TYR 12                                                  | 10.4 | 11.5 | expt val approximate | H  |
| Fungal beta cryptogein                      | ASP 21                                                  | 2.1  | 2.49 |                      | S  |
| Fungal beta cryptogein                      | ASP 30                                                  | 5.0  | 2.51 |                      | H  |
| Fungal beta cryptogein                      | TYR 33                                                  | 18.1 | 12   | Lower Limit          | L  |
| Fungal beta cryptogein                      | TYR 47                                                  | 14.0 | 12   | Lower Limit          | H  |
| Fungal beta cryptogein                      | LYS 61                                                  | 10.4 | 10.1 | Ambiguous assignment | H  |
| Fungal beta cryptogein                      | ASP 72                                                  | 4.0  | 2.61 |                      | B  |
| Fungal beta cryptogein                      | TYR 85                                                  | 10.0 | 10.4 |                      | H  |
| Fungal beta cryptogein                      | TYR 87                                                  | 17.5 | 12   | Lower Limit          | H  |
| Fungal beta cryptogein                      | LYS 94                                                  | 10.7 | 9.4  | Ambiguous assignment | H  |
| Fungal beta cryptogein                      | CTR                                                     | 4.2  | 3.51 |                      | ND |
| Hen egg white lysozyme                      | LYS 1                                                   | 10.9 | 10.8 |                      | L  |
| Hen egg white lysozyme                      | GLU 7                                                   | 3.0  | 2.85 |                      | H  |
| Hen egg white lysozyme                      | LYS 13                                                  | 11.1 | 10.5 |                      | H  |
| Hen egg white lysozyme                      | HIS 15                                                  | 6.0  | 5.36 |                      | T  |
| Hen egg white lysozyme                      | ASP 18                                                  | 2.3  | 2.66 |                      | T  |
| Hen egg white lysozyme                      | TYR 20                                                  | 11.6 | 10.3 |                      | B  |
| Hen egg white lysozyme                      | TYR 23                                                  | 10.7 | 9.8  |                      | B  |
| Hen egg white lysozyme                      | LYS 33                                                  | 9.4  | 10.4 |                      | H  |
| Hen egg white lysozyme                      | GLU 35                                                  | 6.1  | 6.2  |                      | H  |
| Hen egg white lysozyme                      | ASP 48                                                  | 3.5  | 1.6  |                      | T  |
| Hen egg white lysozyme                      | ASP 52                                                  | 4.2  | 3.68 |                      | E  |
| Hen egg white lysozyme                      | ASP 66                                                  | 1.0  | 0.9  |                      | L  |
| Hen egg white lysozyme                      | ASP 87                                                  | 2.1  | 2.1  |                      | S  |
| Hen egg white lysozyme                      | ASP 87                                                  | 2.1  | 2.07 |                      | S  |
| Hen egg white lysozyme                      | LYS 96                                                  | 11.3 | 10.8 |                      | H  |
| Hen egg white lysozyme                      | LYS 97                                                  | 11.0 | 10.3 |                      | H  |
| Hen egg white lysozyme                      | ASP 101                                                 | 5.2  | 4.08 |                      | T  |
| Hen egg white lysozyme                      | LYS 116                                                 | 10.2 | 10.2 |                      | T  |
| Hen egg white lysozyme                      | ASP 119                                                 | 3.9  | 3.2  |                      | L  |
| Hen egg white lysozyme                      | CTR                                                     | 3.3  | 2.75 |                      | ND |
| Human DNA polymerase<br>lambda lyase domain | LYS 312                                                 | 9.6  | 8.1  | 9.5                  | H  |
| Human thioredoxin (ox)                      | GLU 6                                                   | 3.8  |      | 4.9                  | L  |
| Human thioredoxin (ox)                      | GLU 13                                                  | 4.2  |      | 4.4                  | H  |
| Human thioredoxin (ox)                      | ASP 16                                                  | 3.9  |      | 4.2                  | H  |
| Human thioredoxin (ox)                      | ASP 20                                                  | 3.2  |      | 3.8                  | T  |
| Human thioredoxin (ox)                      | ASP 26                                                  | 10.7 | 13.0 | 8.1                  | E  |
| Human thioredoxin (ox)                      | GLU 47                                                  | 4.5  |      | 4.3                  | H  |
| Human thioredoxin (ox)                      | GLU 56                                                  | 2.4  |      | 3.2                  | E  |
| Human thioredoxin (ox)                      | <b>Asp 58/60/61 2.7, 3.9, 5.2 (coupled expt values)</b> |      |      |                      | L  |
| Human thioredoxin (ox)                      | ASP 58                                                  | 2.5  | 7.3  |                      | E  |
| Human thioredoxin (ox)                      | ASP 60                                                  | 3.8  |      |                      | T  |
| Human thioredoxin (ox)                      | ASP 61                                                  | 5.0  | 3.4  |                      | T  |
| Human thioredoxin (ox)                      | ASP 64                                                  | 3.8  |      | 3.2                  | H  |
| Human thioredoxin (ox)                      | GLU 68                                                  | 4.3  |      | 5.1                  | H  |
| Human thioredoxin (ox)                      | GLU 70                                                  | 4.2  |      | 4.8                  | T  |
| Human thioredoxin (ox)                      | GLU 88                                                  | 2.8  |      | 3.6                  | E  |
| Human thioredoxin (ox)                      | GLU 95                                                  | 3.7  |      | 4.1                  | H  |

|                         |                                                         |      |      |             |   |
|-------------------------|---------------------------------------------------------|------|------|-------------|---|
| Human thioredoxin (ox)  | GLU 98                                                  | 3.4  | 3.9  |             | H |
| Human thioredoxin (ox)  | GLU 103                                                 | 4.1  | 4.5  |             | H |
| Human thioredoxin (red) | GLU 6                                                   | 4.3  | 4.8  |             | L |
| Human thioredoxin (red) | GLU 13                                                  | 4.0  | 4.4  |             | H |
| Human thioredoxin (red) | ASP 16                                                  | 3.7  | 4    |             | H |
| Human thioredoxin (red) | ASP 20                                                  | 3.4  | 3.8  |             | T |
| Human thioredoxin (red) | ASP 26                                                  | 10.7 | 9.9  |             | E |
| Human thioredoxin (red) | HIS 43                                                  | 7.4  | 5.5  |             | H |
| Human thioredoxin (red) | GLU 47                                                  | 3.6  | 4.1  |             | H |
| Human thioredoxin (red) | GLU 56                                                  | 2.9  | 3.1  |             | E |
| Human thioredoxin (red) | <b>ASP 58/60/61 2.8, 4.2, 5.3 (coupled expt values)</b> |      |      |             | L |
| Human thioredoxin (red) | ASP 58                                                  | 2.7  | 7.5  |             | E |
| Human thioredoxin (red) | ASP 60                                                  | 5.2  |      |             | T |
| Human thioredoxin (red) | ASP 61                                                  | 4.8  |      |             | T |
| Human thioredoxin (red) | ASP 64                                                  | 3.7  | 3.2  |             | H |
| Human thioredoxin (red) | GLU 68                                                  | 3.9  | 4.9  |             | H |
| Human thioredoxin (red) | GLU 70                                                  | 3.7  | 4.6  |             | T |
| Human thioredoxin (red) | GLU 88                                                  | 2.9  | 3.7  |             | E |
| Human thioredoxin (red) | GLU 95                                                  | 4.2  | 4.1  |             | H |
| Human thioredoxin (red) | GLU 98                                                  | 4.2  | 3.9  |             | H |
| Human thioredoxin (red) | GLU 103                                                 | 4.4  | 4.4  |             | H |
| Myoglobin - horse       | HIS 36                                                  | 6.1  | 7.8  |             | L |
| Myoglobin - horse       | HIS 48                                                  | 5.9  | 5.62 |             | T |
| Myoglobin - horse       | HIS 81                                                  | 7.0  | 6.94 |             | L |
| Myoglobin - horse       | HIS 113                                                 | 6.0  | 5.87 |             | H |
| Myoglobin - horse       | HIS 116                                                 | 6.6  | 6.79 |             | H |
| Myoglobin - horse       | HIS 119                                                 | 5.6  | 6.56 |             | S |
| Myoglobin - sperm whale | HIS 12                                                  | 7.4  | 6.5  |             | H |
| Myoglobin - sperm whale | HIS 24                                                  | -0.5 | 5    | Upper Limit | H |
| Myoglobin - sperm whale | HIS 36                                                  | 7.0  | 8    |             | L |
| Myoglobin - sperm whale | HIS 48                                                  | 6.5  | 5.6  |             | T |
| Myoglobin - sperm whale | HIS 64                                                  | 1.8  | 5    | Upper Limit | H |
| Myoglobin - sperm whale | HIS 81                                                  | 6.9  | 6.9  |             | L |
| Myoglobin - sperm whale | HIS 82                                                  | 3.8  | 5    | Upper Limit | L |
| Myoglobin - sperm whale | HIS 97                                                  | 5.8  | 5.6  |             | S |
| Myoglobin - sperm whale | HIS 113                                                 | 6.5  | 5.4  |             | H |
| Myoglobin - sperm whale | HIS 116                                                 | 6.8  | 6.7  |             | H |
| Myoglobin - sperm whale | HIS 119                                                 | 5.6  | 6.2  |             | L |
| Phage T4 lysozyme       | HIS 31                                                  | 7.9  | 9.1  |             | E |
| RNase A                 | GLU 2                                                   | 3.0  | 2.6  |             | L |
| RNase A                 | GLU 9                                                   | 4.6  | 4    |             | H |
| RNase A                 | HIS 12                                                  | 4.1  | 6    |             | H |
| RNase A                 | ASP 14                                                  | 1.8  | 1.8  |             | L |
| RNase A                 | ASP 38                                                  | 3.2  | 3.5  |             | S |
| RNase A                 | HIS 48                                                  | 7.8  | 6.1  |             | L |
| RNase A                 | GLU 49                                                  | 4.4  | 4.7  |             | S |
| RNase A                 | ASP 53                                                  | 4.2  | 3.7  |             | H |
| RNase A                 | ASP 83                                                  | 5.3  | 3.3  |             | E |
| RNase A                 | GLU 86                                                  | 4.3  | 4    |             | E |

|          |         |      |      |             |    |
|----------|---------|------|------|-------------|----|
| RNase A  | HIS 105 | 6.8  | 6.5  |             | L  |
| RNase A  | GLU 111 | 4.2  | 3.5  |             | E  |
| RNase A  | HIS 119 | 5.5  | 6.5  |             | E  |
| RNase A  | ASP 121 | 2.6  | 3    |             | E  |
| RNase A  | CTR     | 2.8  | 2.3  |             | ?  |
| RNase H1 | GLU 6   | 4.0  | 4.5  |             | E  |
| RNase H1 | ASP 10  | 8.2  | 6.1  |             | E  |
| RNase H1 | GLU 32  | 4.2  | 3.6  |             | E  |
| RNase H1 | GLU 48  | 1.8  | 4.4  |             | H  |
| RNase H1 | GLU 57  | 3.7  | 3.2  |             | H  |
| RNase H1 | GLU 61  | 3.3  | 3.9  |             | S  |
| RNase H1 | HIS 62  | 6.7  | 7    |             | L  |
| RNase H1 | GLU 64  | 4.5  | 4.4  |             | E  |
| RNase H1 | ASP 70  | 3.6  | 2.6  |             | L  |
| RNase H1 | HIS 83  | 5.9  | 5.5  |             | H  |
| RNase H1 | ASP 94  | 4.2  | 3.2  |             | T  |
| RNase H1 | ASP 102 | 0.9  | 2    | Upper Limit | H  |
| RNase H1 | ASP 108 | 3.8  | 3.2  |             | H  |
| RNase H1 | HIS 114 | -0.1 | 5    | Upper Limit | S  |
| RNase H1 | GLU 119 | 5.2  | 4.1  |             | E  |
| RNase H1 | HIS 124 | 7.9  | 7.1  |             | S  |
| RNase H1 | HIS 127 | 7.3  | 7.9  |             | L  |
| RNase H1 | GLU 129 | 3.3  | 3.6  |             | H  |
| RNase H1 | GLU 131 | 4.6  | 4.3  |             | H  |
| RNase H1 | ASP 134 | 2.7  | 4.3  |             | H  |
| RNase H1 | GLU 135 | 4.7  | 4.3  |             | H  |
| RNase H1 | GLU 147 | 4.5  | 4.2  |             | L  |
| RNase H1 | ASP 148 | -1.6 | 2    | Upper Limit | L  |
| RNase H1 | GLU 154 | 4.5  | 4.4  |             | L  |
| RNase H1 | CTR     | 3.4  | 3.4  |             | ND |
| RNase SA | NTR     | 8.6  | 9.14 |             | ND |
| RNase SA | ASP 1   | 3.2  | 3.44 |             | L  |
| RNase SA | GLU 14  | 5.3  | 5.05 |             | H  |
| RNase SA | ASP 17  | 4.7  | 3.72 |             | H  |
| RNase SA | ASP 25  | 5.1  | 4.87 |             | T  |
| RNase SA | TYR 30  | 10.5 | 11.3 |             | S  |
| RNase SA | ASP 33  | 0.6  | 2.39 |             | T  |
| RNase SA | GLU 41  | 3.5  | 4.14 |             | T  |
| RNase SA | TYR 49  | 10.1 | 10.6 |             | T  |
| RNase SA | TYR 51  | 15.8 | 11.5 | Lower Limit | S  |
| RNase SA | TYR 52  | 19.4 | 11.5 | Lower Limit | L  |
| RNase SA | HIS 53  | 8.9  | 8.27 |             | E  |
| RNase SA | GLU 54  | 4.2  | 3.42 |             | E  |
| RNase SA | TYR 55  | 13.8 | 11.5 | Lower Limit | E  |
| RNase SA | GLU 74  | 5.0  | 3.47 |             | S  |
| RNase SA | GLU 78  | 4.9  | 3.13 |             | L  |
| RNase SA | ASP 79  | 7.4  | 7.37 |             | E  |
| RNase SA | TYR 80  | 18.1 | 11.5 | Lower Limit | E  |
| RNase SA | TYR 81  | 13.2 | 11.5 | Lower Limit | E  |

|                            |         |      |      |               |                 |
|----------------------------|---------|------|------|---------------|-----------------|
| RNase SA                   | ASP 84  | 2.7  | 3.01 |               | S               |
| RNase SA                   | HIS 85  | 5.9  | 6.35 |               | T               |
| RNase SA                   | TYR 86  | 14.0 | 11.5 | Lower Limit   | T               |
| RNase SA                   | ASP 93  | 3.8  | 3.09 |               | E               |
| RNase SA                   | CTR     | 2.1  | 2.43 |               | ND              |
| RNase T1                   | ASP 15  | 4.2  | 3.52 |               | H               |
| RNase T1                   | HIS 27  | 8.4  | 7    |               | H               |
| RNase T1                   | GLU 28  | 6.1  | 5.61 |               | H               |
| RNase T1                   | ASP 29  | 5.5  | 4.26 |               | H               |
| RNase T1                   | GLU 31  | 4.6  | 5.36 |               | L               |
| RNase T1                   | HIS 40  | 8.5  | 7.9  |               | E               |
| RNase T1                   | GLU 46  | 4.0  | 3.62 |               | T               |
| RNase T1                   | ASP 49  | 5.0  | 4.22 |               | L               |
| RNase T1                   | GLU 58  | 2.5  | 3.96 |               | E               |
| RNase T1                   | ASP 66  | 4.6  | 3.9  |               | S               |
| RNase T1                   | ASP 76  | 4.1  | 0.5  | B - see below | E               |
| RNase T1                   | GLU 82  | 2.8  | 3.27 |               | T               |
| RNase T1                   | HIS 92  | 6.1  | 7.3  |               | S               |
| RNase T1                   | GLU 102 | 5.3  | 5.3  |               | E               |
| Snake erabutoxin b         | HIS 6   | 0.1  | 2.8  | Upper Limit   | L               |
| Snake erabutoxin b         | TYR 25  | 13.5 | 12   | Lower Limit   | E               |
| Snake erabutoxin b         | HIS 26  | 5.6  | 5.8  |               | E               |
| Staph Nuclease             | HIS 8   | 7.6  | 6.52 |               | L               |
| Staph Nuclease             | HIS 46  | 6.4  | 5.86 |               | L               |
| Staph Nuclease             | HIS 121 | 6.6  | 5.3  |               | T               |
| Staph Nuclease             | HIS 124 | 4.6  | 5.73 |               | H               |
| Turkey ovomucoid inhibitor | NTR     | 6.0  | 8    |               | ND              |
| Turkey ovomucoid inhibitor | ASP 7   | 2.1  | 2.6  | Upper Limit   | L               |
| Turkey ovomucoid inhibitor | GLU 10  | 2.5  | 4.2  |               | T               |
| Turkey ovomucoid inhibitor | TYR 11  | 9.2  | 11.5 | 10.2          | L               |
| Turkey ovomucoid inhibitor | LYS 13  | 11.2 | 14.1 | 9.9           | L               |
| Turkey ovomucoid inhibitor | GLU 19  | 3.7  | 3.2  |               | L               |
| Turkey ovomucoid inhibitor | TYR 20  | 10.3 | 11.1 |               | L               |
| Turkey ovomucoid inhibitor | ASP 27  | 3.3  | 2.3  | Upper Limit   | T               |
| Turkey ovomucoid inhibitor | LYS 29  | 11.4 | 11.1 |               | L               |
| Turkey ovomucoid inhibitor | TYR 31  | 14.9 | 12.5 | Lower Limit   | E               |
| Turkey ovomucoid inhibitor | LYS 34  | 10.6 | 10.1 |               | H               |
| Turkey ovomucoid inhibitor | GLU 43  | 3.9  | 4.8  |               | H               |
| Turkey ovomucoid inhibitor | HIS 52  | 7.3  | 7.5  |               | E               |
| Turkey ovomucoid inhibitor | LYS 55  | 11.1 | 11.1 |               | L               |
| Tyrosin phosphotase        | HIS 66  | 6.8  | 8.3  |               | T               |
| Tyrosin phosphotase        | HIS 72  | 7.3  | 9.2  |               | L               |
| Xylanase BA                | ASP 5   | 4.6  | 3.84 |               | S               |
| Xylanase BA                | HIS 11  | 7.4  | 0.7  | 6.5           | change boundary |
| Xylanase BA                | ASP 12  | 5.2  | 3.94 |               | T               |
| Xylanase BA                | ASP 15  | 3.2  | 3.35 |               | E               |
| Xylanase BA                | GLU 17  | 3.5  | 4.31 |               | E               |
| Xylanase BA                | ASP 21  | 2.8  | 3.46 |               | L               |
| Xylanase BA                | HIS 32  | 5.4  | 6.7  |               | S               |

|             |         |      |     |      |                 |    |
|-------------|---------|------|-----|------|-----------------|----|
| Xylanase BA | HIS 60  | 4.0  | 6.2 | 4    |                 | H  |
| Xylanase BA | ASP 90  | 4.0  |     | 3.88 |                 | T  |
| Xylanase BA | GLU 94  | 4.6  | 8.1 | 3.94 |                 | E  |
| Xylanase BA | ASP 99  | 2.2  |     | 2.7  | Upper Limit     | E  |
| Xylanase BA | ASP 118 | 2.5  |     | 2.7  | Upper Limit     | T  |
| Xylanase BA | ASP 123 | 0.4  |     | 2.7  | Upper Limit     | E  |
| Xylanase BA | GLU 126 | 4.7  |     | 4.51 |                 | E  |
| Xylanase BA | HIS 162 | -2.5 |     | 2.7  | Upper Limit     | H  |
| Xylanase BA | GLU 167 | 2.3  |     | 3.58 |                 | H  |
| Xylanase BA | GLU 178 | 4.5  | 7.1 | 4.1  | change boundary | E  |
| Xylanase BA | GLU 184 | 5.3  |     | 6.5  |                 | E  |
| Xylanase BA | CTR     | 4.2  |     | 6.52 |                 | ND |
| Xylanase BC | ASP 11  | 2.2  |     | 2.5  |                 | L  |
| Xylanase BC | GLU 78  | 4.3  | 7.2 | 4.6  |                 | E  |
| Xylanase BC | ASP 101 | 1.1  |     | 2    | Upper Limit     | T  |
| Xylanase BC | ASP 106 | 4.6  |     | 2.7  |                 | E  |
| Xylanase BC | ASP 119 | 3.3  |     | 3.2  |                 | T  |
| Xylanase BC | ASP 121 | 4.7  |     | 3.6  |                 | S  |
| Xylanase BC | HIS 149 | -1.3 |     | 2.3  | Upper Limit     | H  |
| Xylanase BC | HIS 156 | 6.7  |     | 6.5  |                 | T  |
| Xylanase BC | GLU 172 | 6.7  | 4.1 | 6.7  |                 | E  |

References to experimental values in Table S2

pK2 provided when bimodal equation provides significantly better fit to calculated titration

### Comments

Upper or lower limit indicates the residue pK could not be seen in experimental titration

Change boundary: Rerun with MCCE selected exposed conformer substituted for experimental input positions used to calculate the corrected boundary

Other notes refer to ambiguity of assignments.

**A** Exp pK = 3.2. Protonation of His occurs with denaturation of the protein. Therefore, pKa for the wildtype protein should be <3.2. High desolvation energy is consistent with the low solvent accessibility found in the NMR measurements. (Fujii et al., 1980, J Biochem (Tokyo))

**B** Small ppm shift is found in Spitzner et al. at pH 4 and 8, ambiguous data in Koumanov et al. Pfeiffer et al. suggest it is protonated at pH 5.5

DSSP assignment: H helix; E b-sheet; L loops; ND termini not defined; S,T etc other

**Supplementary Material S4.** Comparison of pK<sub>a</sub>s calculated by MCCE, MD/GB/TI and PROPKA

| PDB                     | Res            | Exp         | pK <sub>a</sub> - pK <sub>a,rsol</sub> |             |             | Error       |            |             |
|-------------------------|----------------|-------------|----------------------------------------|-------------|-------------|-------------|------------|-------------|
|                         |                |             | MCCE                                   | MD          | PROPKA      | MCCE        | MD         | PROPKA      |
| 3rn3                    | Asp 14         | -2.2        | -2.7                                   | -0.3        | -2.6        | -0.5        | 1.9        | -0.4        |
| 4lzt                    | Asp 87         | -1.9        | -2.0                                   | -0.8        | -1.5        | -0.1        | 1.1        | 0.4         |
| <i>1ppf<sup>a</sup></i> | <i>Asp 27</i>  | <i>-1.8</i> | <i>-0.8</i>                            | <i>0.6</i>  | <i>-1.6</i> | <i>1.0</i>  | <b>2.4</b> | <i>0.2</i>  |
| 1xnb                    | Asp 11         | -1.5        | -2.0                                   | -0.1        | -2.0        | -0.5        | 1.4        | -0.5        |
| 1beo                    | Asp 21         | -1.5        | -2.0                                   | -1.1        | -2.6        | -0.5        | 0.4        | -1.1        |
| 4lzt                    | Asp 18         | -1.3        | -1.7                                   | -0.8        | -1.2        | -0.4        | 0.5        | 0.1         |
| 1xnb                    | Asp 106        | -1.3        | 0.5                                    | -1.2        | -1.0        | 1.8         | 0.1        | 0.3         |
| 1pga                    | Asp 22         | -1.1        | -0.6                                   | -0.4        | -1.8        | 0.5         | 0.7        | -0.7        |
| 3rn3                    | Asp 121        | -0.9        | -1.8                                   | 1.0         | -0.3        | -0.9        | 1.9        | 0.6         |
| 1a2p                    | Asp 75         | -0.9        | -1.6                                   | 0.3         | -5.3        | -0.7        | 1.2        | <b>-4.4</b> |
| 2rn2                    | Asp 94         | -0.8        | 0.1                                    | 0.3         | -1.3        | 0.9         | 1.1        | -0.5        |
| 1pga                    | Asp 47         | -0.6        | 0.2                                    | -0.1        | -1.3        | 0.8         | 0.5        | -0.7        |
| 3rn3                    | Asp 53         | -0.3        | 0.2                                    | 1.0         | -0.6        | 0.5         | 1.3        | -0.3        |
| 4lzt                    | Asp 52         | -0.3        | 0.2                                    | 2.0         | -1.0        | 0.5         | <b>2.3</b> | -0.7        |
| 1pga                    | Asp 36         | -0.2        | 1.0                                    | 0.6         | -0.1        | 1.2         | 0.8        | 0.1         |
| 2trx                    | Asp 20         | -0.2        | 0.2                                    | 0.0         | -1.5        | 0.4         | 0.2        | -1.3        |
| 1de3                    | Asp 59         | 0.1         | -0.8                                   | -0.1        | -0.8        | -0.9        | -0.2       | -0.9        |
| 1de3                    | Asp 57         | 0.3         | 0.0                                    | -0.1        | 0.0         | -0.3        | -0.4       | -0.3        |
| 2rn2                    | Asp 10         | 2.1         | 4.6                                    | 2.7         | 3.0         | <b>2.5</b>  | 0.6        | 0.9         |
| 2trx                    | Asp 26         | 4.1         | 2.9                                    | 3.7         | 1.2         | -1.2        | -0.4       | <b>-2.9</b> |
| 3rn3                    | Glu 2          | -1.8        | -3.3                                   | -2.0        | -1.7        | -1.5        | -0.2       | 0.1         |
| 4lzt                    | Glu 7          | -1.5        | -1.5                                   | 0.0         | -0.7        | 0.0         | 1.5        | 0.8         |
| 1ppf                    | Glu 19         | -1.2        | -0.8                                   | -0.3        | -0.5        | 0.4         | 0.9        | 0.7         |
| 2rn2                    | Glu 57         | -1.2        | -0.5                                   | 0.2         | -1.8        | 0.7         | 1.4        | -0.6        |
| 1a2p                    | Glu 60         | -1.2        | -0.5                                   | 0.7         | -0.6        | 0.7         | 1.9        | 0.6         |
| 3rn3                    | Glu 111        | -0.9        | -0.1                                   | 0.5         | 0.2         | 0.8         | 1.4        | 1.1         |
| 2rn2                    | Glu 129        | -0.8        | -1.3                                   | -0.5        | -0.9        | -0.5        | 0.3        | -0.1        |
| 2rn2                    | Glu 61         | -0.5        | -1.2                                   | 0.5         | -0.8        | -0.7        | 1.0        | -0.3        |
| 3rn3                    | Glu 9          | -0.4        | 0.1                                    | 1.3         | 0.2         | 0.5         | 1.7        | 0.6         |
| 2bca                    | Glu 26         | -0.3        | -0.1                                   | 0.4         | 0.4         | 0.2         | 0.7        | 0.7         |
| 1ppf                    | Glu 10         | -0.3        | -2.0                                   | 0.7         | 0.0         | <b>-1.7</b> | 1.0        | 0.3         |
| 2rn2                    | Glu 119        | -0.3        | 0.6                                    | 1.6         | -0.9        | 0.9         | 1.9        | -0.6        |
| 1pga                    | Glu 27         | 0.1         | 0.9                                    | 1.3         | -0.1        | 0.8         | 1.2        | -0.2        |
| 1ppf                    | Glu 43         | 0.4         | -0.5                                   | 0.3         | 0.1         | -0.9        | -0.1       | -0.3        |
| 1de3                    | Glu 96         | 0.7         | 1.4                                    | 2.4         | 0.6         | 0.7         | 1.7        | -0.1        |
| 1ans                    | Glu 20         | 1.0         | 0.2                                    | 0.7         | 0.1         | -0.8        | -0.3       | -0.9        |
| 1rga                    | Glu 28         | 1.5         | 0.6                                    | 1.2         | -0.3        | -0.9        | -0.3       | -1.8        |
| 4lzt                    | Glu 35         | 1.8         | 1.1                                    | 1.8         | 0.6         | -0.7        | 0.0        | -1.2        |
| 1hng                    | Glu 41         | 2.3         | 1.9                                    | 2.3         | 0.3         | -0.4        | 0.0        | -2.0        |
| 1xnb                    | Glu 172        | 2.3         | 0.7                                    | 2.7         | 2.9         | -1.6        | 0.4        | 0.6         |
| <i>2snm<sup>b</sup></i> | <i>Lys 66</i>  | <i>-4.1</i> | <i>-11.5</i>                           | <i>-3.1</i> | <i>-2.6</i> | <b>-7.4</b> | 1.0        | 1.5         |
| <i>1154<sup>b</sup></i> | <i>Lys 102</i> | <i>-3.9</i> | <i>-9.7</i>                            | <i>-0.9</i> | <i>-0.3</i> | <b>-5.8</b> | <b>3.0</b> | <b>3.6</b>  |
| <i>1mut<sup>a</sup></i> | <i>Lys 39</i>  | <i>-2.1</i> | <i>1.3</i>                             | <i>0.3</i>  | <i>0.0</i>  | <b>3.4</b>  | <b>2.4</b> | <b>2.1</b>  |
| 1nfn                    | Lys 146        | -1.3        | -0.8                                   | -0.8        | 0.0         | 0.5         | 0.5        | 1.3         |
| <i>1fez<sup>a</sup></i> | <i>Lys 53</i>  | <i>-1.2</i> | <i>-3.4</i>                            | <i>1.8</i>  | <i>-2.4</i> | <b>-2.2</b> | <b>3.0</b> | -1.2        |

|                         |     |           |             |             |             |             |             |            |             |
|-------------------------|-----|-----------|-------------|-------------|-------------|-------------|-------------|------------|-------------|
| 1gs9                    | Lys | 146       | -1.1        | -0.7        | -0.8        | 0.0         | 0.4         | 0.3        | 1.1         |
| 1le2                    | Lys | 143       | -1.1        | -0.5        | -0.2        | -0.5        | 0.6         | 0.9        | 0.6         |
| 1nfn                    | Lys | 143       | -1.0        | -0.8        | -0.3        | 0.0         | 0.2         | 0.7        | 1.0         |
| 1nzp                    | Lys | 312       | -1.0        | 0.3         | 0.7         | -0.2        | 1.3         | 1.7        | 0.8         |
| 1gs9                    | Lys | 143       | -0.6        | -0.7        | -0.3        | 0.0         | -0.1        | 0.3        | 0.6         |
| 1le2                    | Lys | 146       | -0.6        | -1.5        | -0.5        | -0.1        | -0.9        | 0.1        | 0.5         |
| 1ppf                    | Lys | 34        | -0.4        | 0.2         | -0.2        | -0.3        | 0.6         | 0.2        | 0.1         |
| 4lzt                    | Lys | 33        | -0.1        | -0.8        | -0.4        | -0.2        | -0.7        | -0.3       | -0.1        |
| 2bca                    | Lys | 41        | 0.3         | 0.3         | 0.2         | -0.1        | 0.0         | -0.1       | -0.4        |
| 4lzt                    | Lys | 96        | 0.3         | 1.3         | 0.1         | -0.3        | 1.0         | -0.2       | -0.6        |
| 1pga                    | Lys | 28        | 0.4         | 0.6         | 0.2         | -0.6        | 0.2         | -0.2       | -1.0        |
| 2bca                    | Lys | 16        | 0.4         | 2.4         | 0.7         | -0.6        | <b>2.0</b>  | 0.3        | -1.0        |
| 1ppf                    | Lys | 55        | 0.6         | 0.7         | 0.2         | 0.0         | 0.1         | -0.4       | -0.6        |
| 2bca                    | Lys | 7         | 0.7         | 1.0         | 0.9         | 0.0         | 0.3         | 0.2        | -0.7        |
| 2bca                    | Lys | 55        | 1.3         | 1.5         | 1.3         | 0.0         | 0.2         | 0.0        | -1.3        |
| <i>3ebx<sup>a</sup></i> | His | 6         | -3.5        | -5.3        | -4.6        | 0.0         | -1.8        | -1.1       | <b>3.5</b>  |
| <i>3ssi<sup>b</sup></i> | His | <u>43</u> | <u>-3.1</u> | <u>-6.3</u> | <u>-3.1</u> | <u>-1.4</u> | <b>-3.2</b> | 0.0        | 1.7         |
| 1stn                    | His | 121       | -1.0        | 0.8         | 1.4         | -1.0        | 1.8         | <b>2.4</b> | 0.0         |
| 4lzt                    | His | 15        | -0.9        | -0.4        | 1.9         | 1.0         | 0.5         | <b>2.8</b> | 1.9         |
| 1ert                    | His | 43        | -0.8        | 0.1         | 0.2         | 0.0         | 0.9         | 1.0        | 0.8         |
| 1de3                    | His | 137       | -0.5        | -1.0        | 1.3         | -4.3        | -0.5        | 1.8        | <b>-3.8</b> |
| 3rn3                    | His | 48        | -0.2        | 1.4         | 4.9         | -3.1        | 1.6         | <b>5.1</b> | <b>-2.9</b> |
| 3rn3                    | His | 119       | 0.2         | -0.8        | -0.5        | 0.2         | -1.0        | -0.7       | 0.0         |
| 3rn3                    | His | 12        | -0.3        | -2.2        | 0.5         | -4.5        | -1.9        | 0.8        | <b>-4.2</b> |
| 1de3                    | His | 104       | 0.2         | 0.6         | 2.3         | 0.1         | 0.4         | <b>2.1</b> | -0.1        |
| 1de3                    | His | 36        | 0.5         | 0.3         | 0.7         | 0.2         | -0.2        | 0.2        | -0.3        |
| 2rn2                    | His | 62        | 0.7         | 0.3         | 0.7         | 0.7         | -0.4        | 0.0        | 0.0         |
| 2rn2                    | His | 124       | 0.8         | 1.0         | -1.1        | 0.1         | 0.2         | -1.9       | -0.7        |
| 1de3                    | His | 50        | 1.4         | 1.1         | 3.1         | -3.8        | -0.3        | 1.7        | <b>-5.2</b> |
| 1rga                    | His | 92        | 1.5         | 0.1         | 1.2         | -0.4        | -1.4        | -0.3       | -1.9        |
| 1rga                    | His | 40        | 1.6         | 2.1         | 1.6         | 2.5         | 0.5         | 0.0        | 0.9         |
| 2rn2                    | His | 127       | 1.6         | 1.0         | 1.6         | 0.8         | -0.6        | 0.0        | -0.8        |
| 1dg9                    | His | 66        | 2.0         | 0.5         | 1.3         | 1.3         | -1.5        | -0.7       | -0.7        |
| 2lzm                    | His | 31        | 2.8         | 1.6         | 0.9         | 1.3         | -1.2        | -1.9       | -1.5        |
| 1dg9                    | His | 72        | 2.9         | 1.0         | 3.2         | 1.6         | -1.9        | 0.3        | -1.3        |
| RMSD <sup>1</sup>       |     |           |             | 0.94        | 1.24        | 1.40        |             |            |             |
| RMSD <sup>2</sup>       |     |           |             | 1.46        | 1.27        | 1.45        |             |            |             |

Calculated pK<sub>a</sub> shift using MD/GB/TI (Simonson et al. J Am Chem Soc, 2004) and PROPKA (Li et al. Proteins, 2005) methods as reported in Stanton and Houk's study (Stanton and Houk, J Chem Theory Comput, 2008).

Errors greater than 2pH units in bold.

a: The experimental pK<sub>a</sub> is out of the range of the titration or is measured by protein activity.

b: the measured pK<sub>a</sub> is coupled to protein denaturation.

RMSD<sup>1</sup>: The RMSD between calculations and experiments for 73 residues, excluding (a) and (b).

RMSD<sup>2</sup>: The RMSD between calculations and experiments for 76 residues, excluding (a).
